# Supplementary material for: Nb and Ta layer doping effects on the interfacial energetics and electronic properties of LaAlO3/SrTiO3 heterostructure: first-principles analysis
Source: Royal Society of Chemistry journal article supplement (doi:10.1039/c5cp05100b), 2015-11-04
Supplement: c5cp05100b1.pdf [file c5cp05100b1.pdf]

**Nb and Ta Layer Doping Effects on the Interfacial Energetics and  
Electronic Properties of LaAlO<sub>3</sub>/SrTiO<sub>3</sub> Heterostructure: First-  
Principles Analysis**

Safdar Nazir, Maziar Behtash, Jianli Cheng, Jian Luo, and Kesong Yang\*

*Department of NanoEngineering, University of California, San Diego, 9500 Gilman  
Drive, Mail Code 0448, La Jolla, CA 92093-0448, USA*

\*E-mail: [kesong@ucsd.edu](mailto:kesong@ucsd.edu), Tel: +1-858-534-2514

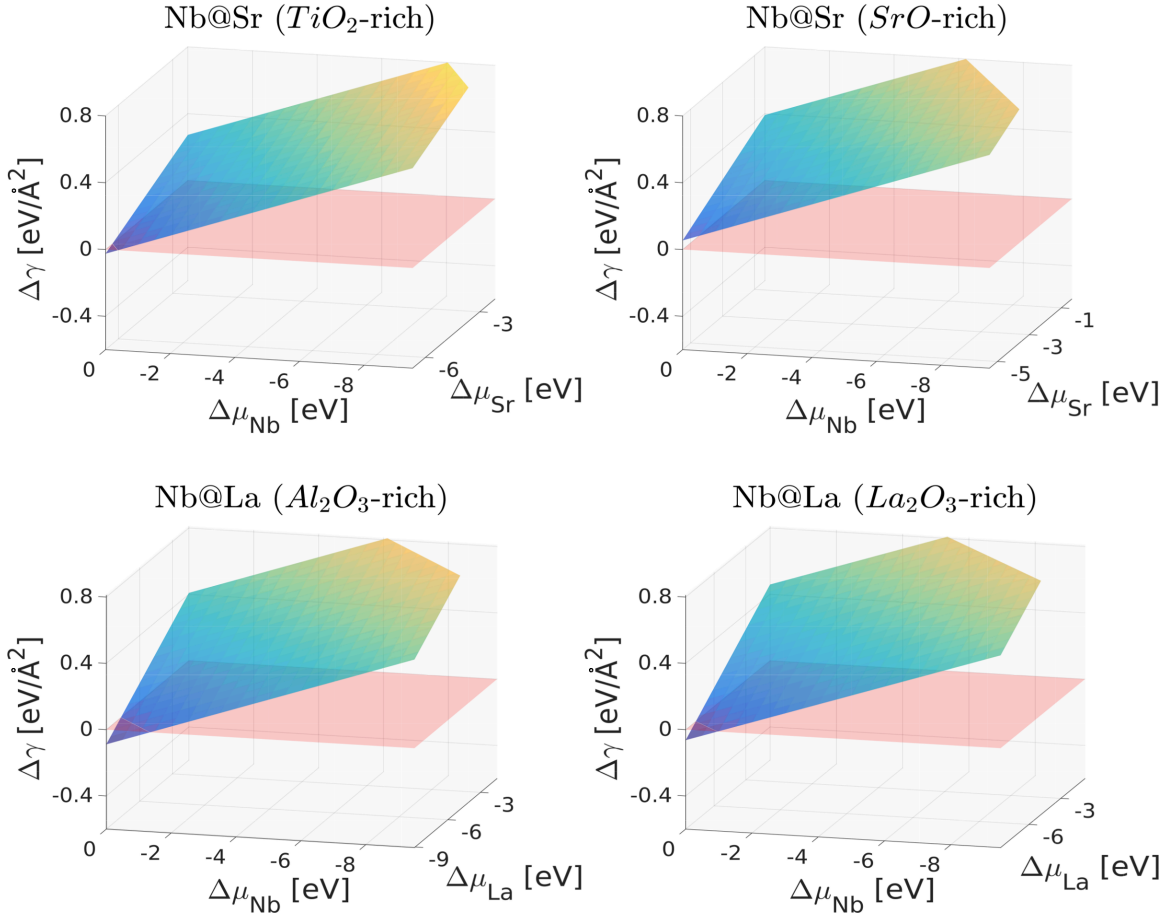

**Figure 1S:** Calculated change of interfacial energy between Nb@X (X=Sr and La) doped and the LAO/STO undoped HS systems. The Nb@Sr doping was considered under  $TiO_2$  and SrO-rich conditions, respectively. The Nb@La doping was considered under  $Al_2O_3$  and  $La_2O_3$ -rich conditions, respectively. The translucent red plane delineates  $\Delta\gamma = 0$ , the value below that means that doping is energetically favorable.

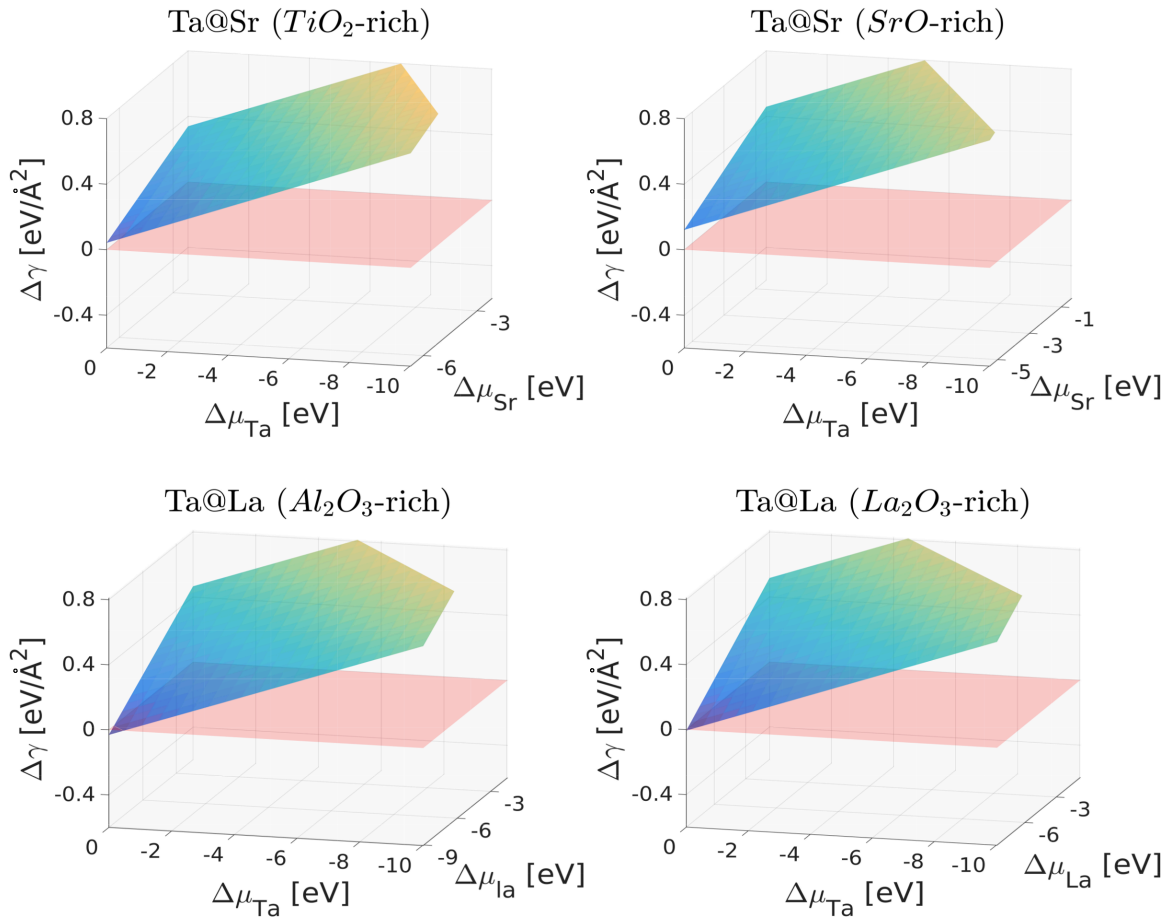

**Figure 2S:** Calculated change of interfacial energy between Ta@X (X=Sr and La) doped and the LAO/STO undoped HS systems.

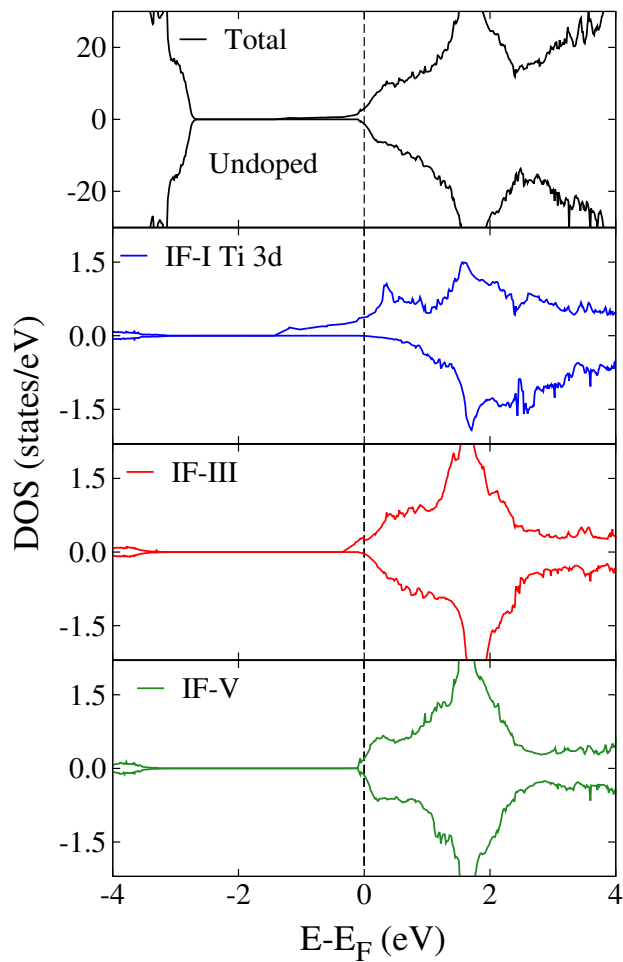

**Figure 3S:** Calculated spin-polarized total and Ti 3d partial DOS for undoped LAO/STO HS system. The IF-I, IF-III, and IF-V stand for the first, third, and fifth  $\text{TiO}_2$  layers of STO near the interfacial region, respectively.
